# Supplementary material
Source: HighWire-hosted journal article supplement (https://www.cmajopen.ca/highwire/filestream/81014/field_highwire_adjunct_files/2/open-2016-0122-3_at.pdf)
Supplement: open-2016-0122-3_at.pdf [file open-2016-0122-3_at.pdf]

[Type text]

**Appendix 3 (as supplied by the authors): Top 25 most commonly prescribed medications not covered by the list (ordered by rank at inner city site)**

| Medications                                                  | Prescription Rank<br>(inner city site) | Prescription Rank<br>(suburban site) |
|--------------------------------------------------------------|----------------------------------------|--------------------------------------|
| Zopiclone                                                    | 21                                     | 18                                   |
| Vitamin B                                                    | 27                                     | 73                                   |
| Calcium                                                      | 37                                     | 121                                  |
| Multivitamin                                                 | 50                                     | 165                                  |
| Estradiol (17 $\beta$ )                                      | 56                                     | 26                                   |
| Vitamins/Minerals                                            | 58                                     | 111                                  |
| Conjugated Estrogens                                         | 66                                     | 83                                   |
| Fusidic Acid                                                 | 76                                     | -                                    |
| Tacrolimus                                                   | 83                                     | 162                                  |
| Varenicline                                                  | 92                                     | 179                                  |
| Ezetimibe                                                    | 94                                     | 104                                  |
| Tretinoin                                                    | 101                                    | 180                                  |
| Etonogestrel/Ethinyl Estradiol                               | 105                                    | 126                                  |
| Baclofen                                                     | 107                                    | -                                    |
| Cyclobenzaprine                                              | 115                                    | 117                                  |
| Montelukast                                                  | 120                                    | 132                                  |
| Cromolyn                                                     | 123                                    | -                                    |
| Olopatadine                                                  | 124                                    | 91                                   |
| Vitamins/minerals/folic acid                                 | 135                                    | -                                    |
| Psyllium hydrophilic mucilloid                               | 145                                    | 177                                  |
| Zinc/pramoxine                                               | 152                                    | -                                    |
| Mupirocin                                                    | 159                                    | 114                                  |
| Fenofibrate                                                  | 162                                    | 181                                  |
| Benzotropine                                                 | 166                                    | -                                    |
| Betahistine                                                  | 172                                    | 172                                  |
| Hydrocortisone/Framycetin<br>Sulfate/Cinchocaine Hcl/Esculin | -                                      | 101                                  |
| Adapalene/Benzoyl Peroxide                                   | -                                      | 142                                  |
| Colchicine                                                   | -                                      | 156                                  |
| Donepezil                                                    | -                                      | 163                                  |
| Ketorolac                                                    | -                                      | 175                                  |
| Atovaquone/proguanil                                         | -                                      | 190                                  |
